# Supplementary material for: Enrichment of leukocytes in peripheral blood using 3D printed tubes
Source: PLoS One. 2021 Jul 23;16(7):e0254615. doi: 10.1371/journal.pone.0254615 (PMC8301617; doi:10.1371/journal.pone.0254615)
Supplement: S2 Table — (DOCX) [file pone.0254615.s007.docx]

# Table S2. Clinical blood samples from 25 subjects tested in LSA-3 to produce enrichment of leukocytes using the pulling style method.

| **ID** | **Sex** | **Total leukocyte cells (WBC *Nt* )** | **Total erythrocyt cells (RBC *Mt*)** | **Enrichment of leukocyte cells (WBC *Nup*)** | **Depletion of erythrocyte cells (RBC  *Mdown*)** | **Leukocyte recovery rate (%)** | **Erythrocyte depleted rate (%)** | **Leukocyte-to-erythrocyte ratio** |
| --- | --- | --- | --- | --- | --- | --- | --- | --- |
| 1 | Female | 7.77×106 | 6.61×109 | 7.14×106 | 5.77×109 | 92% | 87% | 1:117 |
| 2 | Female | 8.28×106 | 6.37×109 | 7.43×106 | 5.77×109 | 90% | 91% | 1:75 |
| 3 | Female | 9.60×106 | 7.18×109 | 8.54×106 | 6.34×109 | 89% | 89% | 1:100 |
| 4 | Male | 9.01×106 | 8.07×109 | 8.45×106 | 6.23×109 | 93% | 90% | 1:100 |
| 5 | Female | 10.32×106 | 7.62×109 | 9.72×106 | 7.00×109 | 94% | 92% | 1:65 |
| 6 | Female | 11.30×106 | 5.66×109 | 10.87×106 | 5.18×109 | 96% | 92% | 1:48 |
| 7 | Female | 9.42×106 | 6.41×109 | 8.31×106 | 5.61×109 | 88% | 88% | 1:95 |
| 8 | Female | 7.47×106 | 5.24×109 | 6.62×106 | 4.89×109 | 87% | 93% | 1:53 |
| 9 | Female | 14.90×106 | 5.01×109 | 14.10×106 | 4.25×109 | 95% | 85% | 1:58 |
| 10 | Male | 12.47×106 | 9.60×109 | 11.55×106 | 8.86×109 | 93% | 92% | 1:62 |
| 11 | Male | 15.36×106 | 8.05×109 | 14.80×106 | 7.25×109 | 96% | 91% | 1:52 |
| 12 | Female | 9.60×106 | 8.52×109 | 9.10×106 | 8.01×109 | 95% | 94% | 1:53 |
| 13 | Male | 12.00×106 | 9.71×109 | 11.50×106 | 8.99×109 | 96% | 93% | 1:42 |
| 14 | Female | 8.26×106 | 8.27×109 | 7.94×106 | 7.75×109 | 96% | 94% | 1:42 |
| 15 | Female | 15.12×106 | 9.64×109 | 14.20×106 | 8.92×109 | 94% | 93% | 1:50 |
| 16 | Female | 11.03×106 | 9.41×109 | 10.02×106 | 8.53×109 | 91% | 91% | 1:81 |
| 17 | Female | 16.01×106 | 8.91×109 | 14.64×106 | 8.50×109 | 92% | 93% | 1:28 |
| 18 | Female | 12.69×106 | 10.29×109 | 11.58×106 | 9.47×109 | 92% | 92% | 1:68 |
| 19 | Male | 10.70×106 | 9.14×109 | 10.27×106 | 8.23×109 | 96% | 90% | 1:85 |
| 20 | Female | 9.77×106 | 5.69×109 | 9.62×106 | 5.45×109 | 98% | 96% | 1:25 |
| 21 | Female | 9.16×106 | 6.65×109 | 8.48×106 | 6.04×109 | 93% | 91% | 1:67 |
| 22 | Female | 14.70×106 | 9.94×109 | 13.70×106 | 9.61×109 | 93% | 97% | 1:23 |
| 23 | Female | 12.07×106 | 9.29×109 | 11.10×106 | 8.72×109 | 92% | 94% | 1:23 |
| 24 | Male | 19.94×106 | 9.49×109 | 18.92×106 | 8.05×109 | 95% | 85% | 1:73 |
| 25 | Male | 15.84×106 | 9.68×109 | 15.36×106 | 8.79×109 | 97% | 91% | 1:56 |
